# Supplementary material for: Co-localization of CENP-C and CENP-H to discontinuous domains of CENP-A chromatin at human neocentromeres
Source: PubMed Central journal article supplement (PMC2323242; doi:10.1186/gb-2007-8-7-r148), 2007-07-25

# Additional data file Figure 1

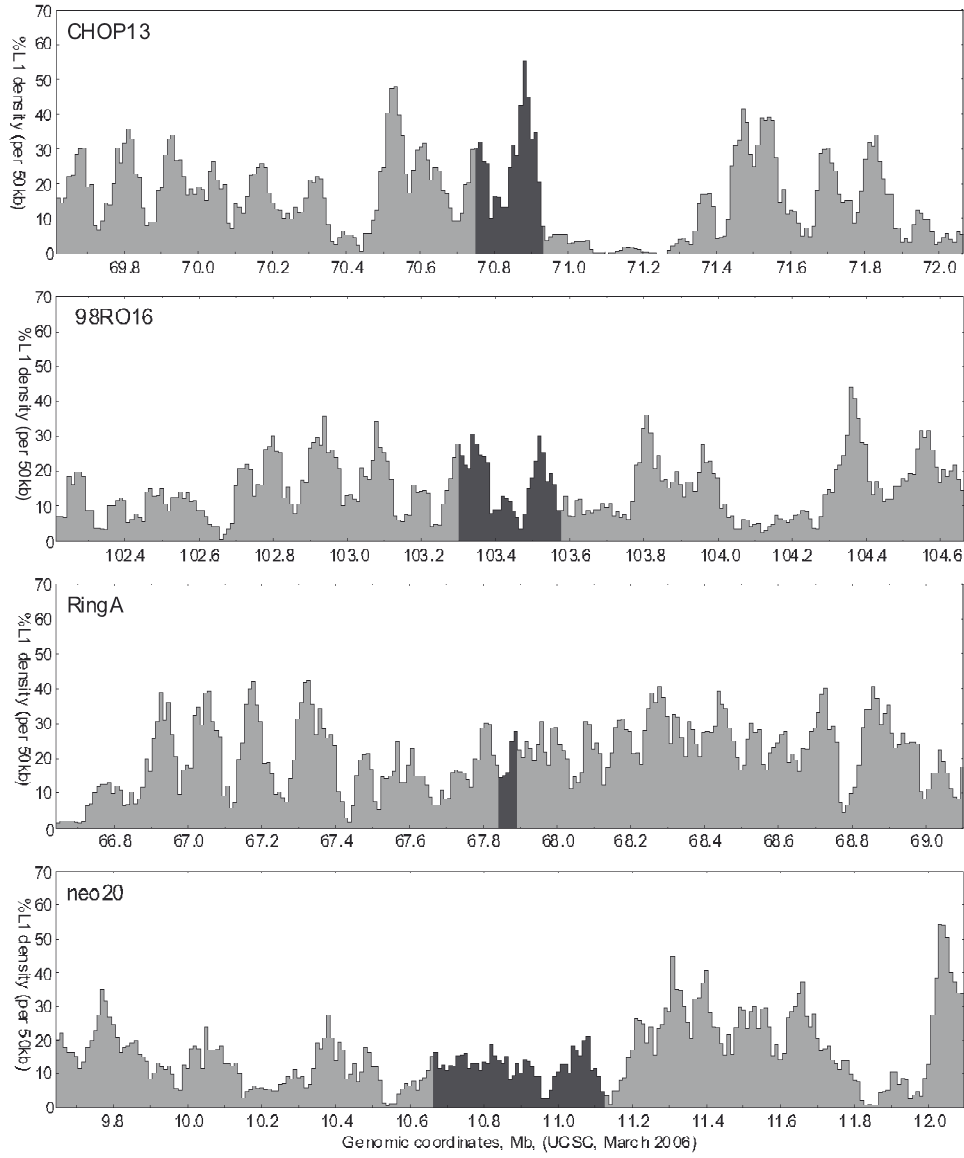

Supplement: gb-2007-8-7-r148-S1.pdf [file gb-2007-8-7-r148-S1.pdf]
